# Supplementary material
Source: PubMed Central journal article supplement (PMC3801439)
Supplement: emboj2013205df1.pdf [file emboj2013205df1.pdf]

Figure 1B

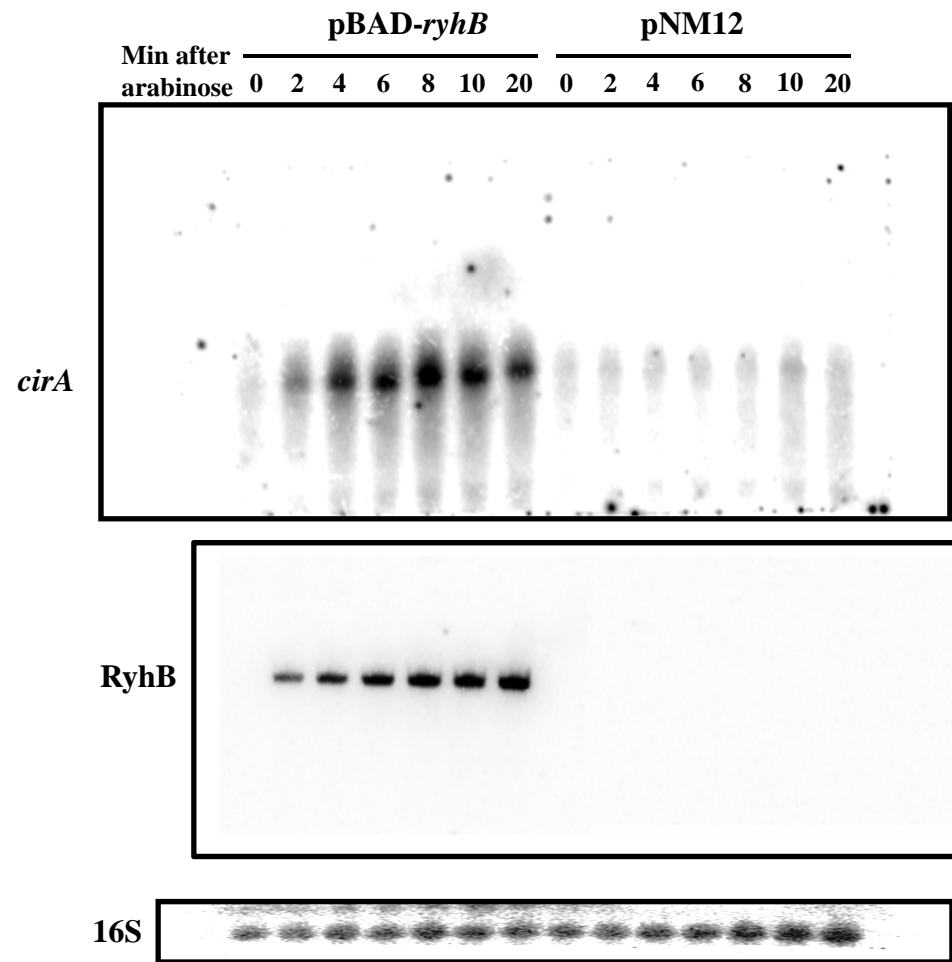

source file, EMBOJ-2013-84565R1

Figure 1C

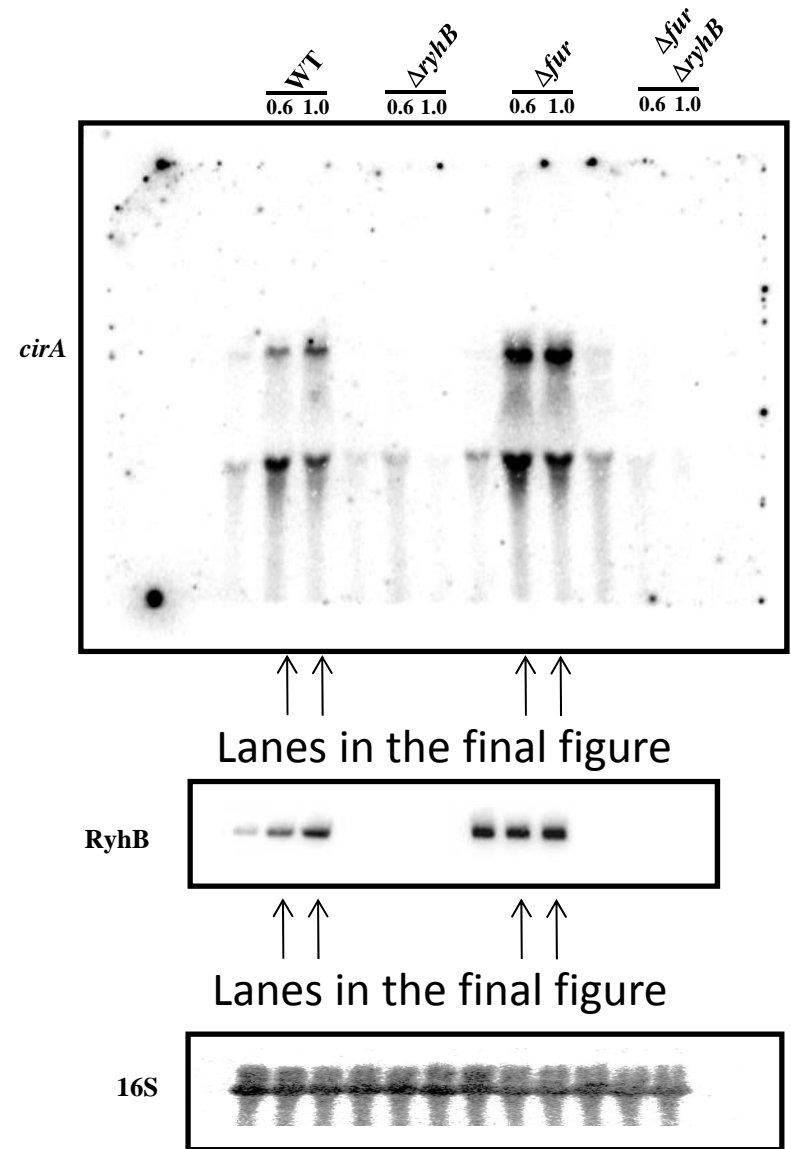

Figure 1D

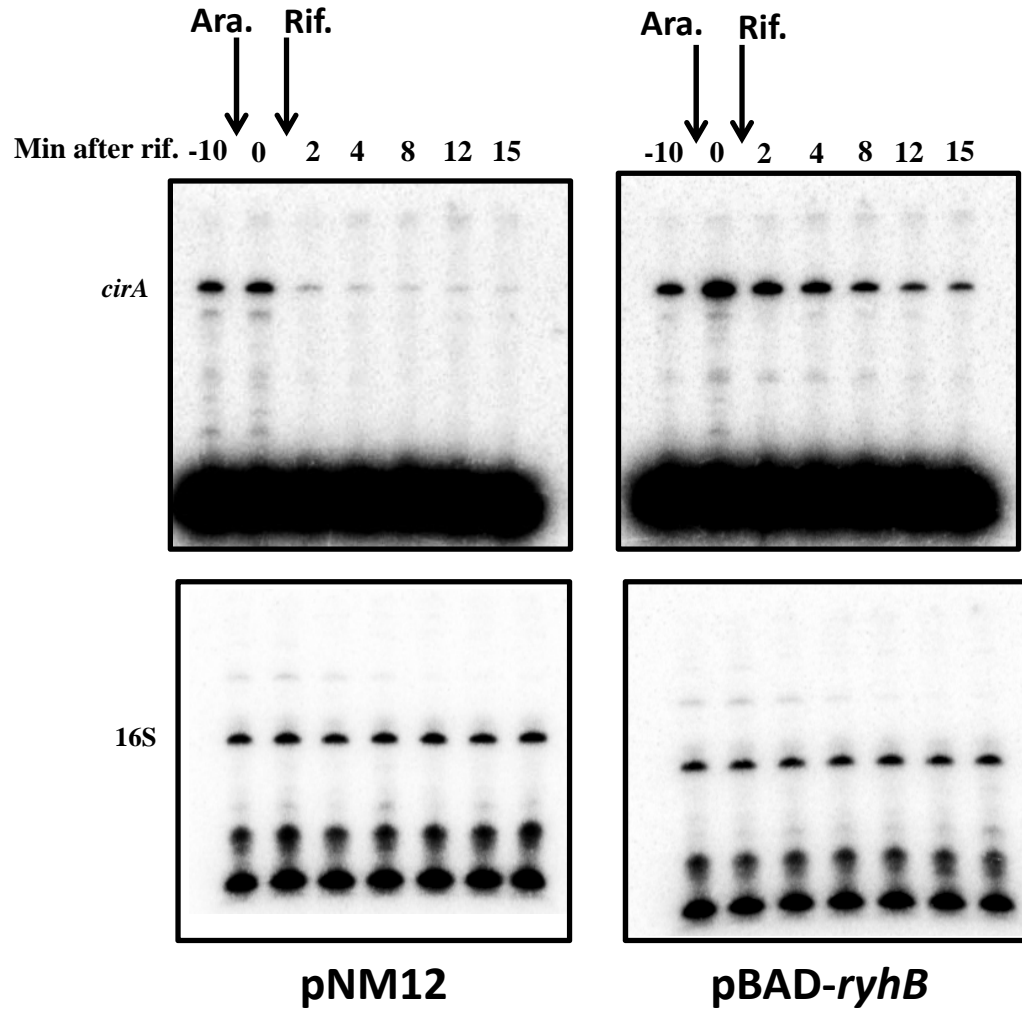

Figure 1E

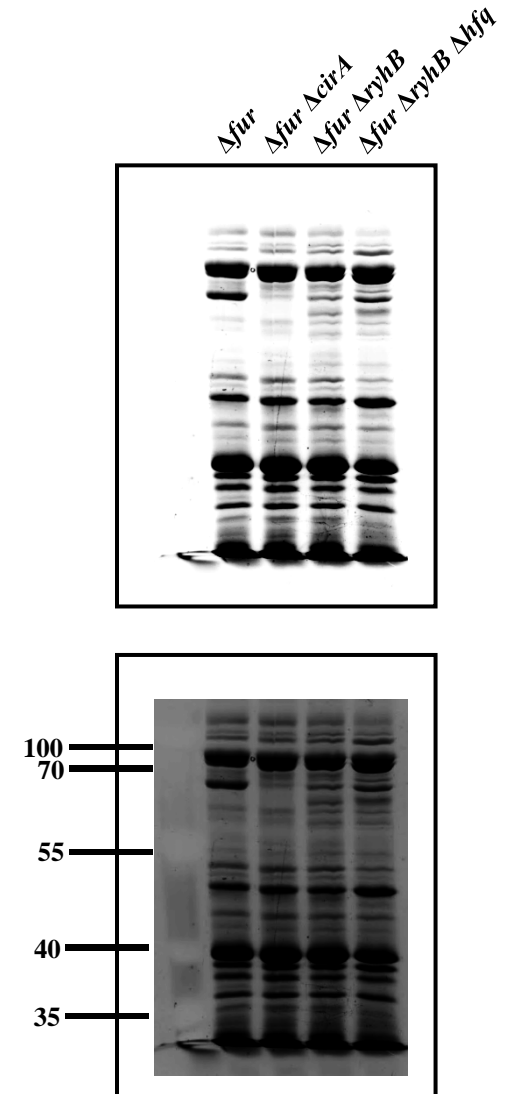

Lower Figure is overexposed to better show the MW marker
