# Supplementary material
Source: PubMed Central journal article supplement (PMC3801439)

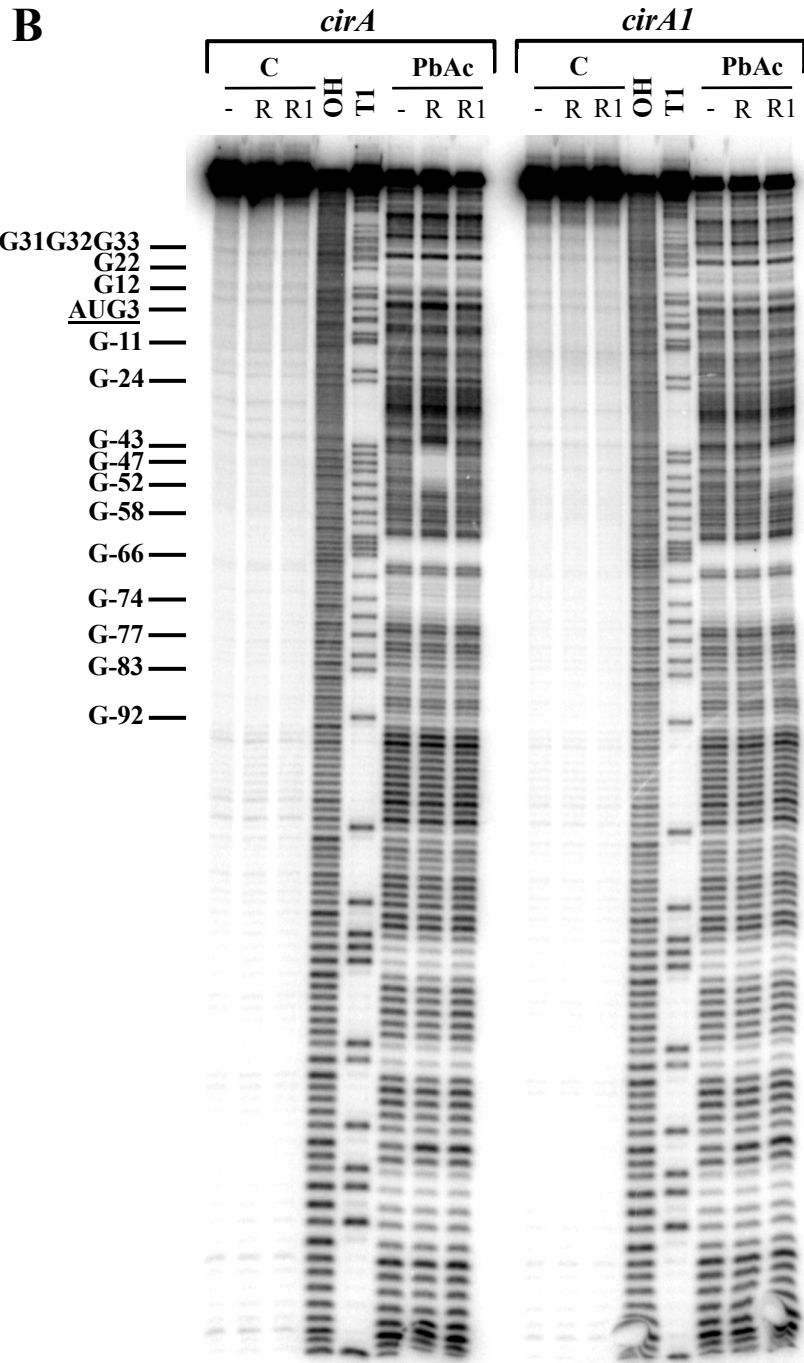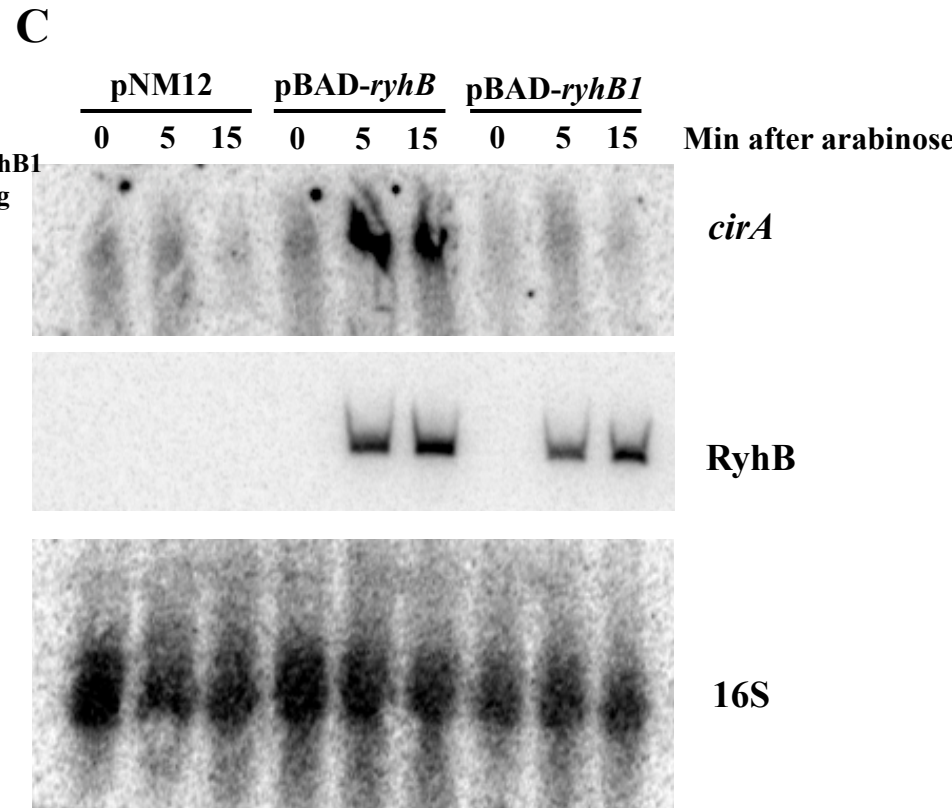

Supplement: emboj2013205df3.pdf [file emboj2013205df3.pdf]

**A**

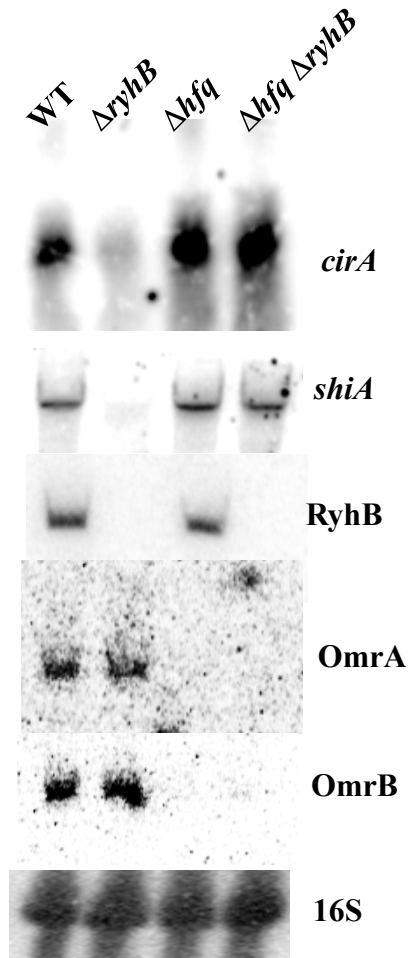

**C**

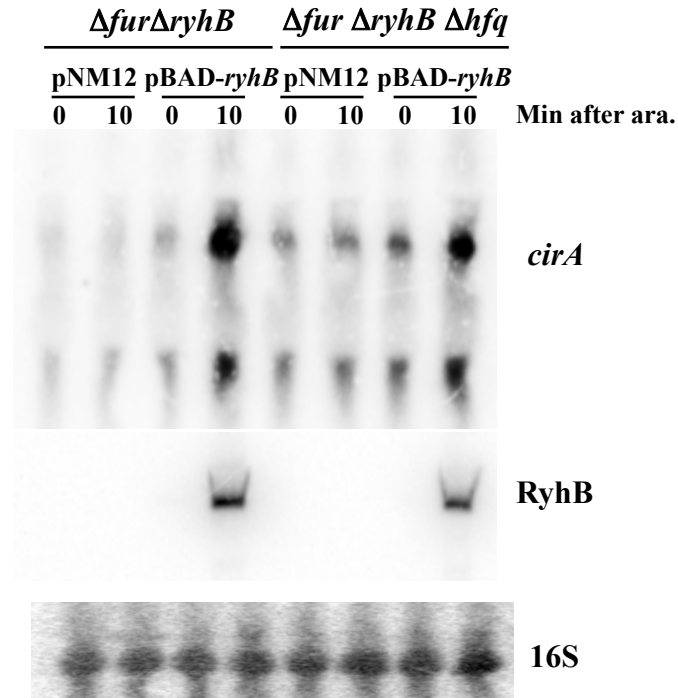

Supplement: emboj2013205df5.pdf [file emboj2013205df5.pdf]

**A**

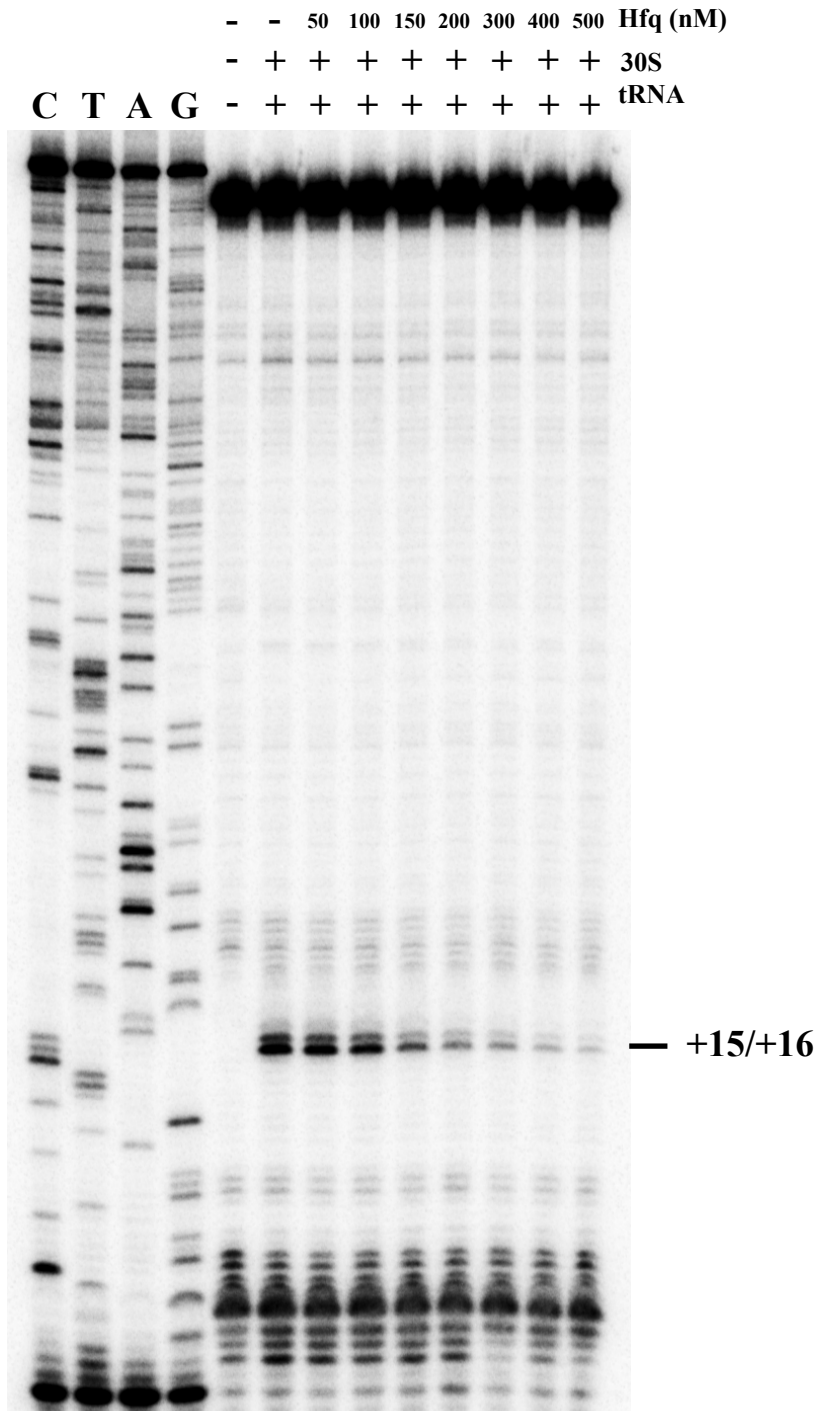

**B**

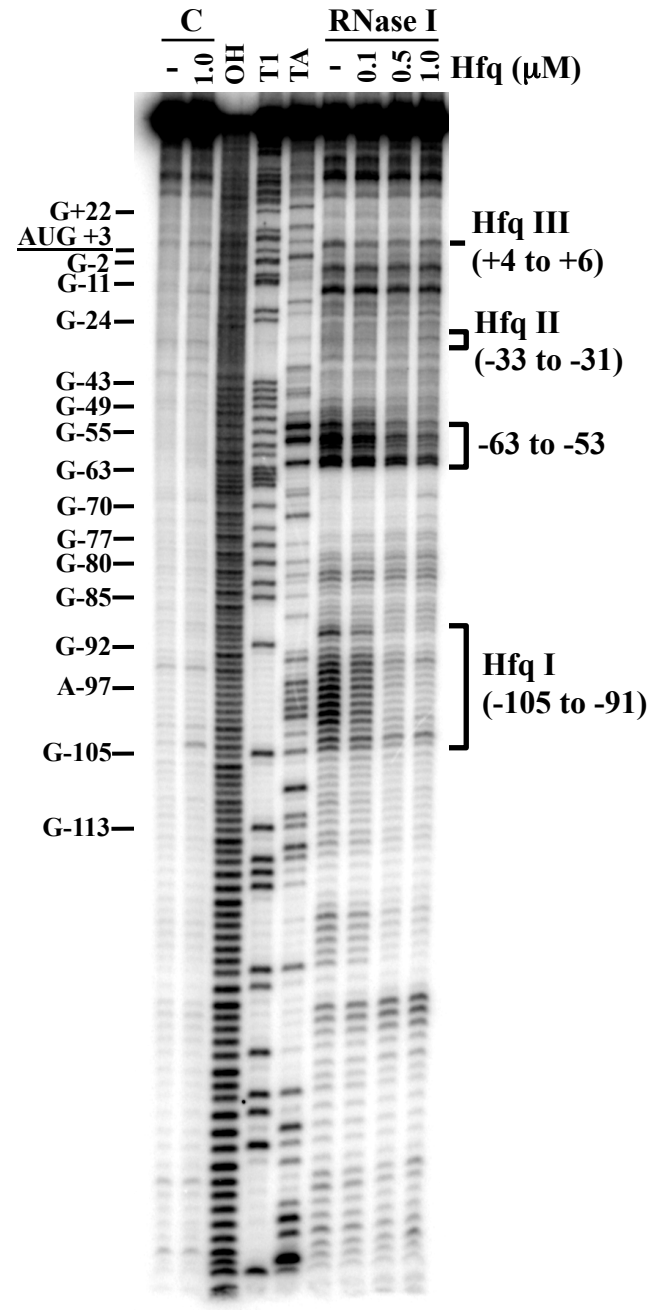

**C**

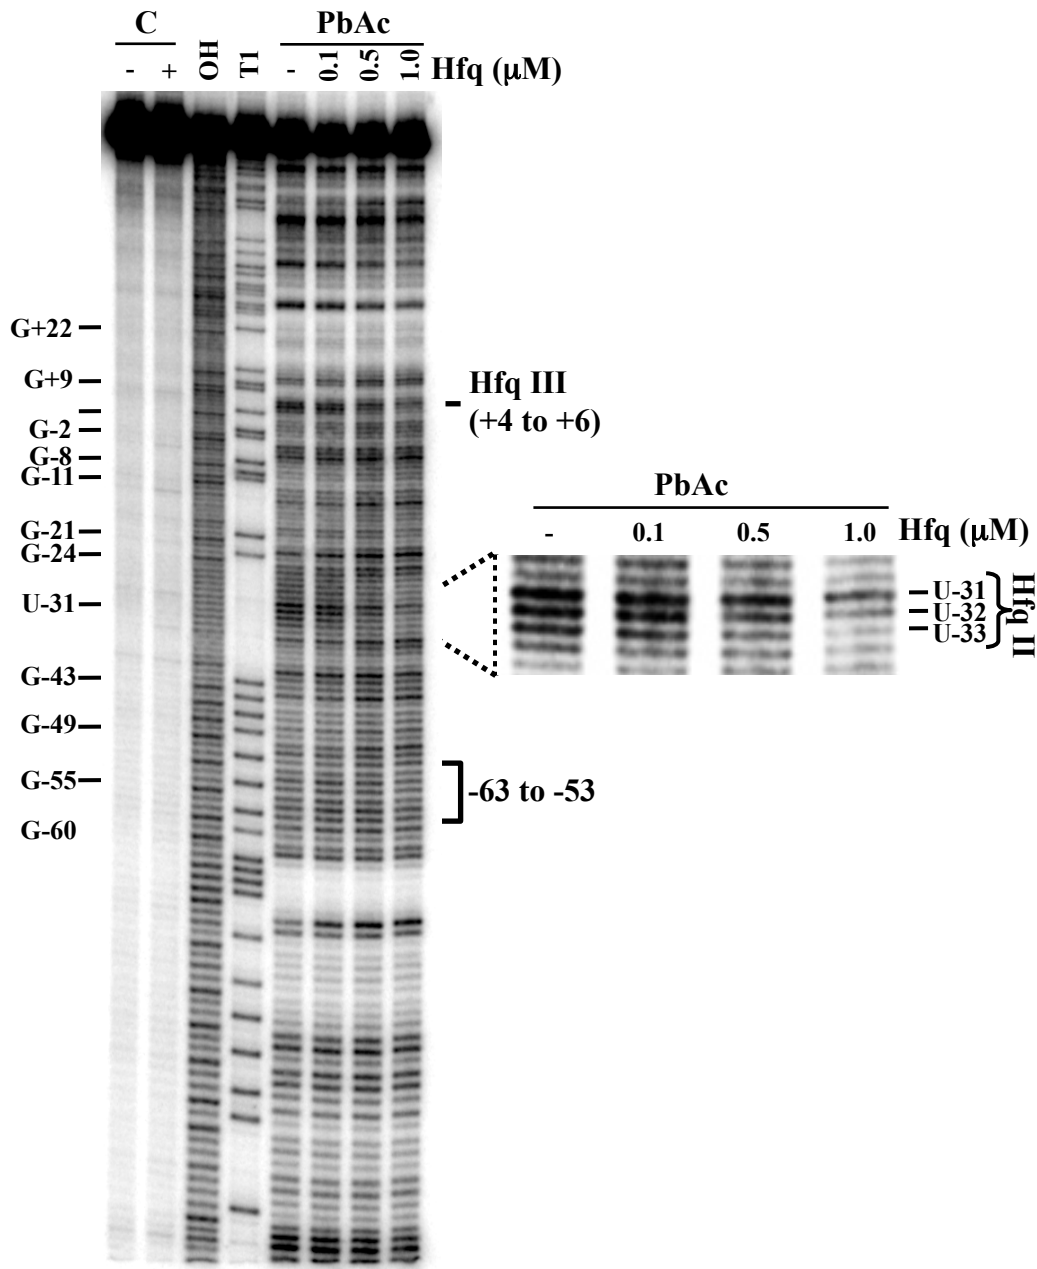

Source file Figures 6CD  
Salvail et al., 2013

**D**

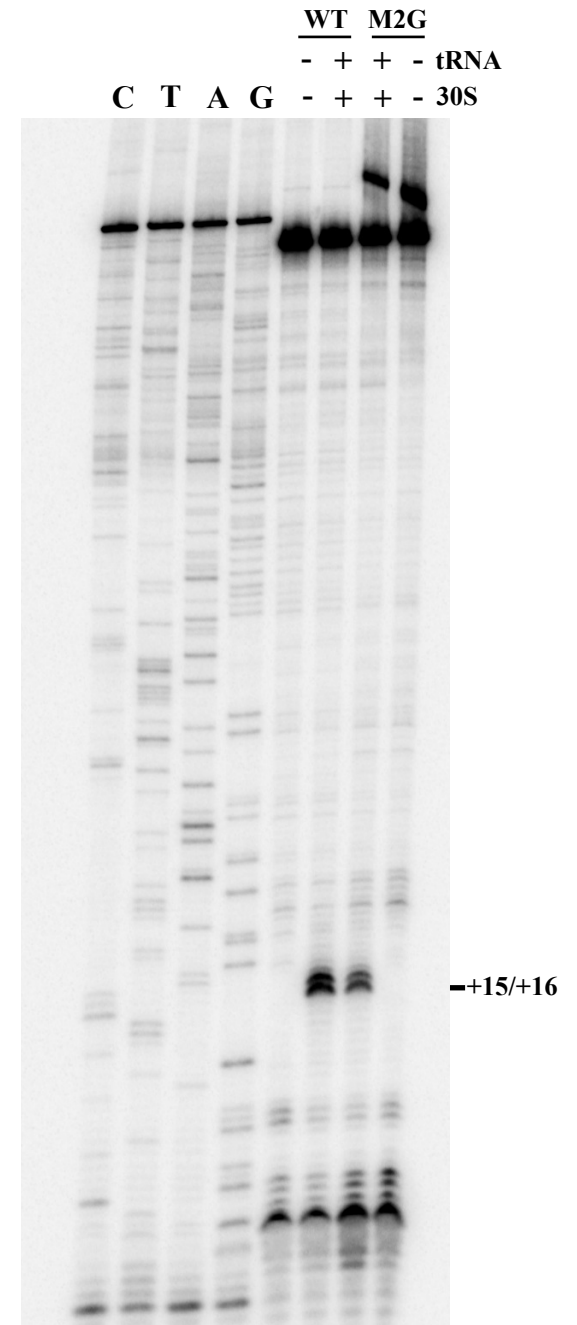

Supplement: emboj2013205df6.pdf [file emboj2013205df6.pdf]

**A**

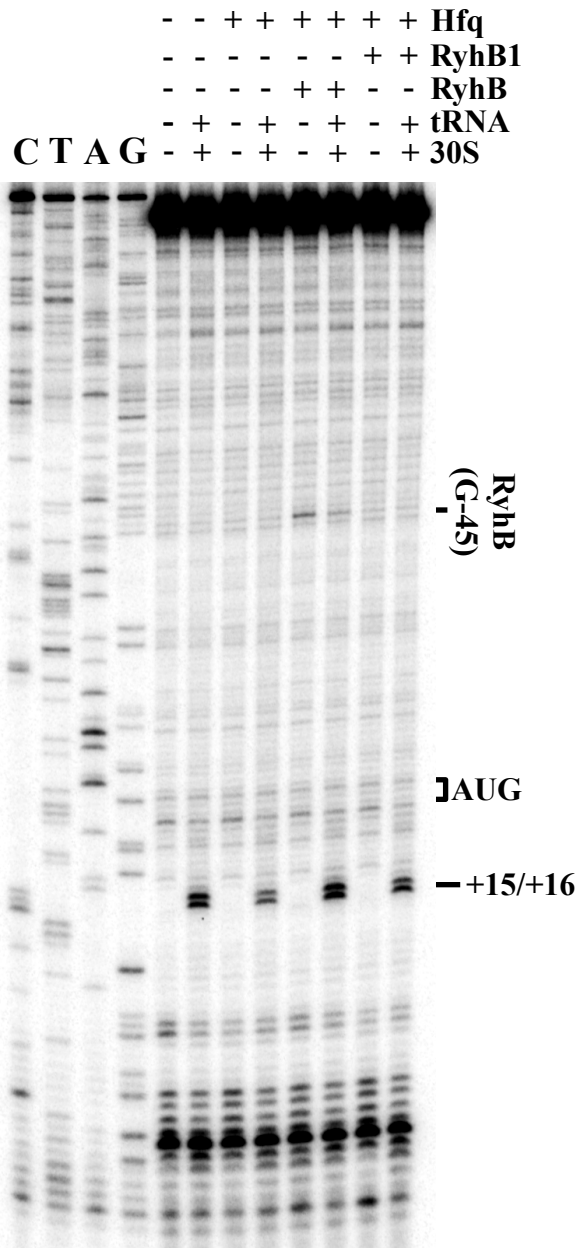

**B**

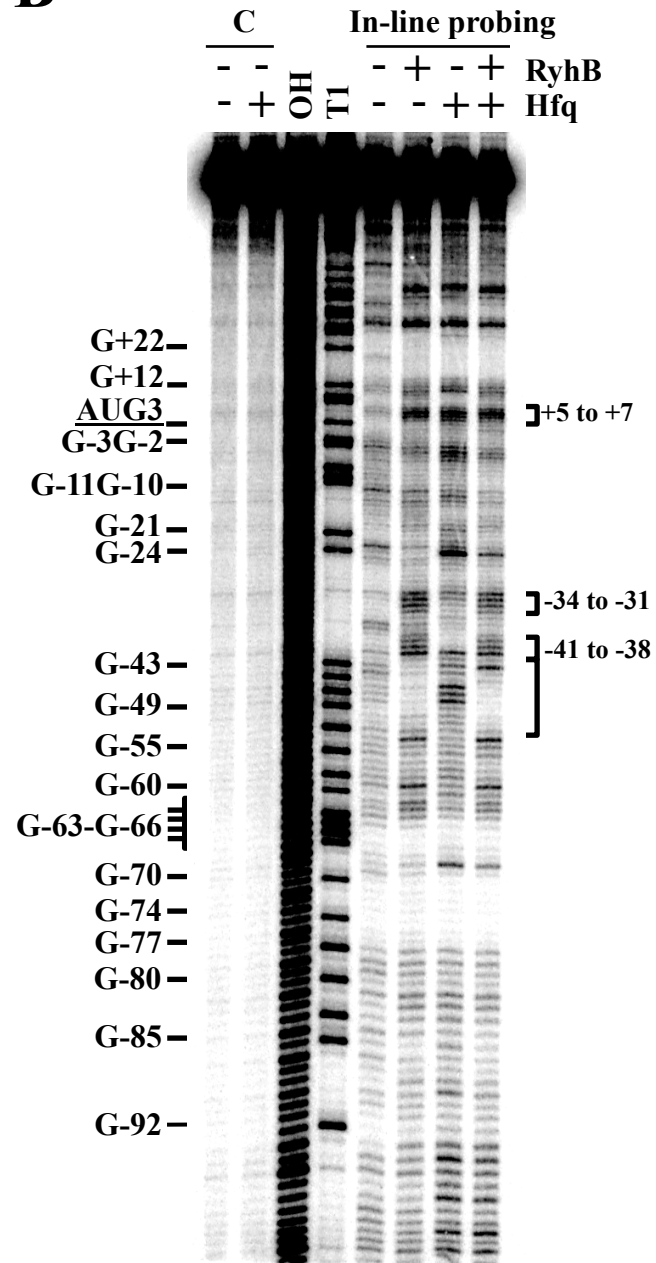

Supplement: emboj2013205df7.pdf [file emboj2013205df7.pdf]
